# Supplementary material
Source: PubMed Central journal article supplement (PMC4259043)
Supplement: NIHMS637158-supplement-Supporting_Information.pdf [file NIHMS637158-supplement-Supporting_Information.pdf]

# Supporting information

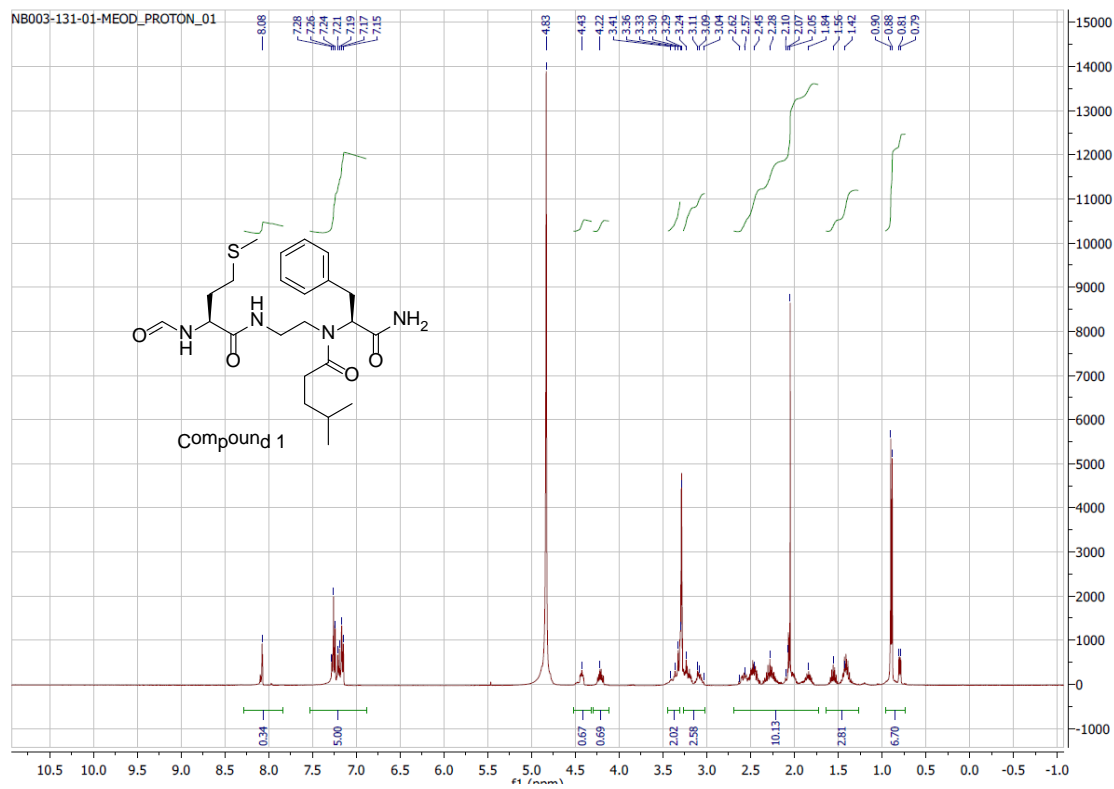

Compound 1.  $^1\text{H-NMR}$  ( $\text{CD}_3\text{OD}$ , 400 MHz)

# Supporting information

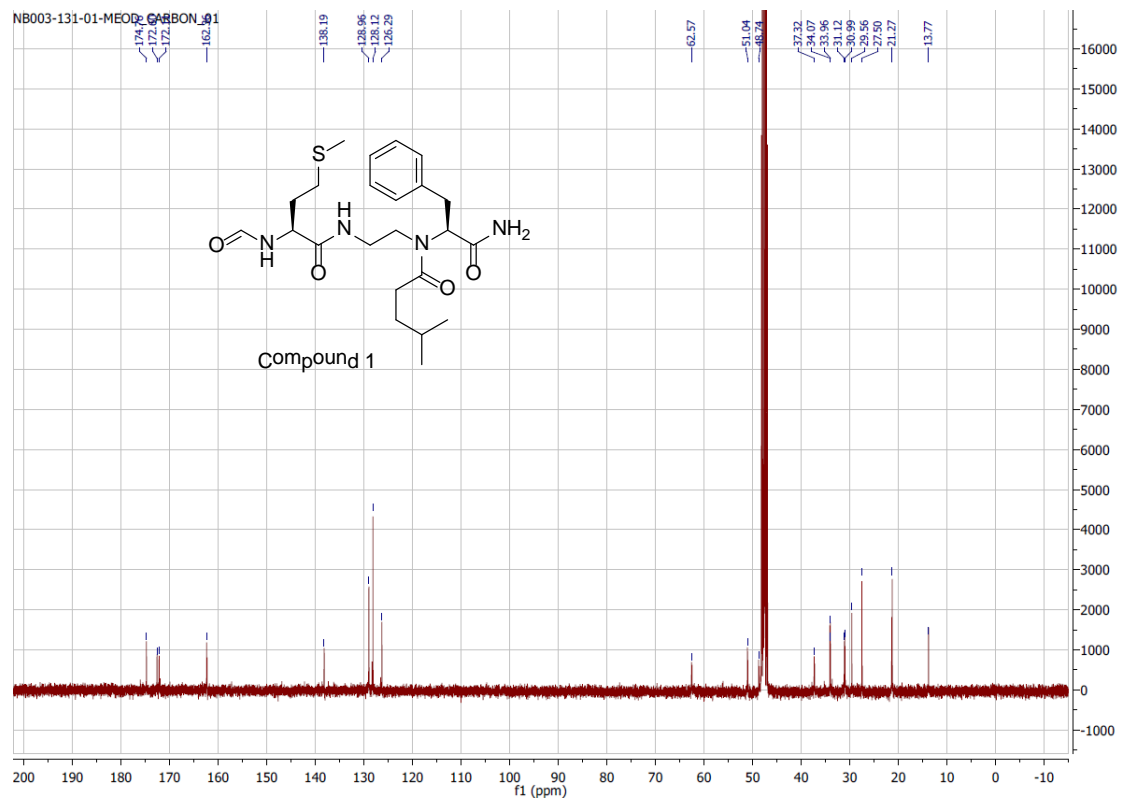

Compound 1.  $^{13}\text{C}$ -NMR ( $\text{CD}_3\text{OD}$ , 100 MHz)

# Supporting information

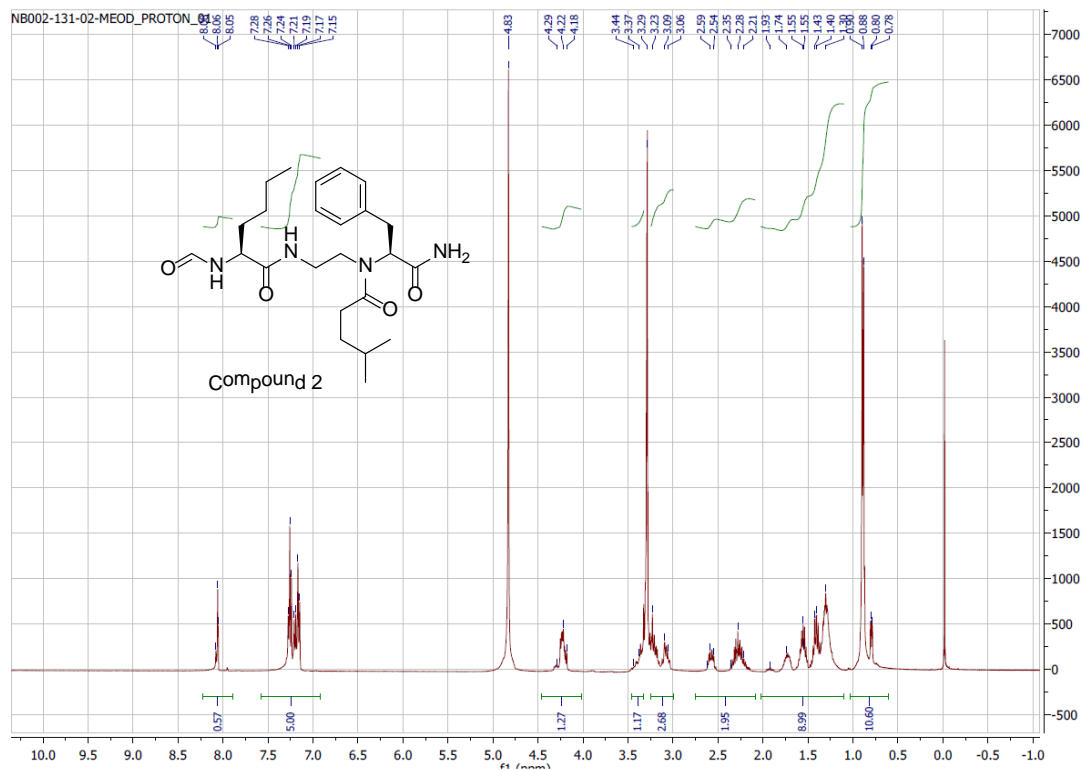

Compound 2.  $^1\text{H-NMR}$  ( $\text{CD}_3\text{OD}$ , 400 MHz)

# Supporting information

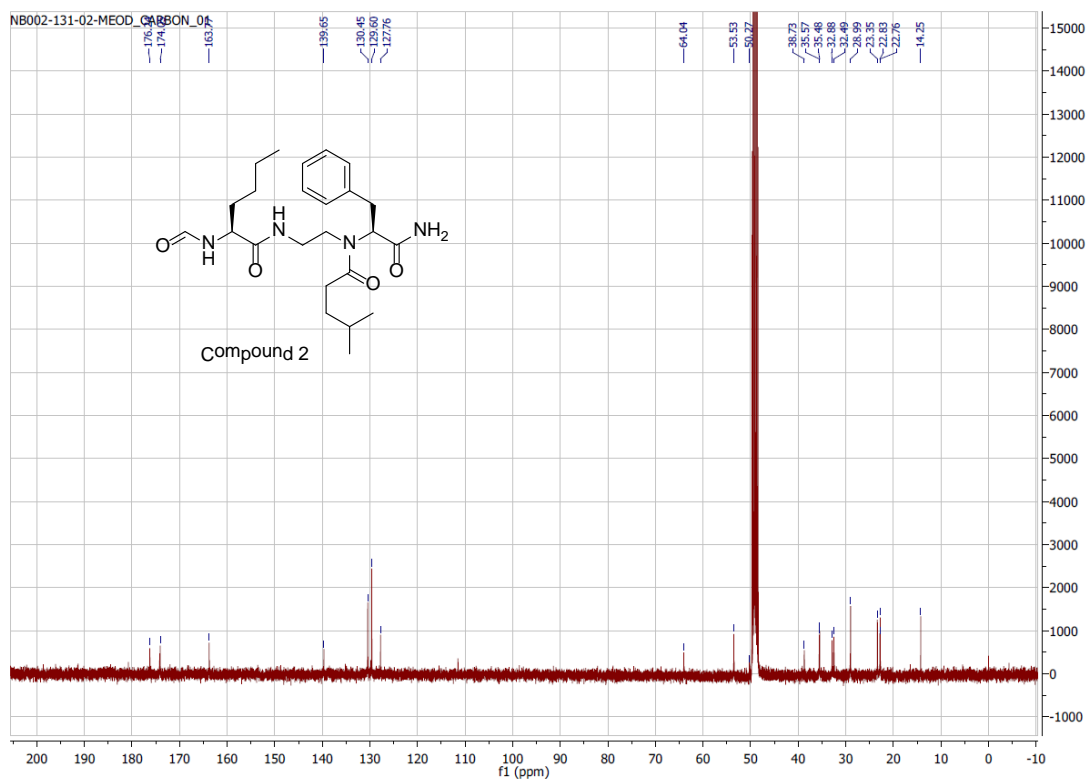

Compound 2.  $^{13}\text{C}$ -NMR ( $\text{CD}_3\text{OD}$ , 100 MHz)

# Supporting information

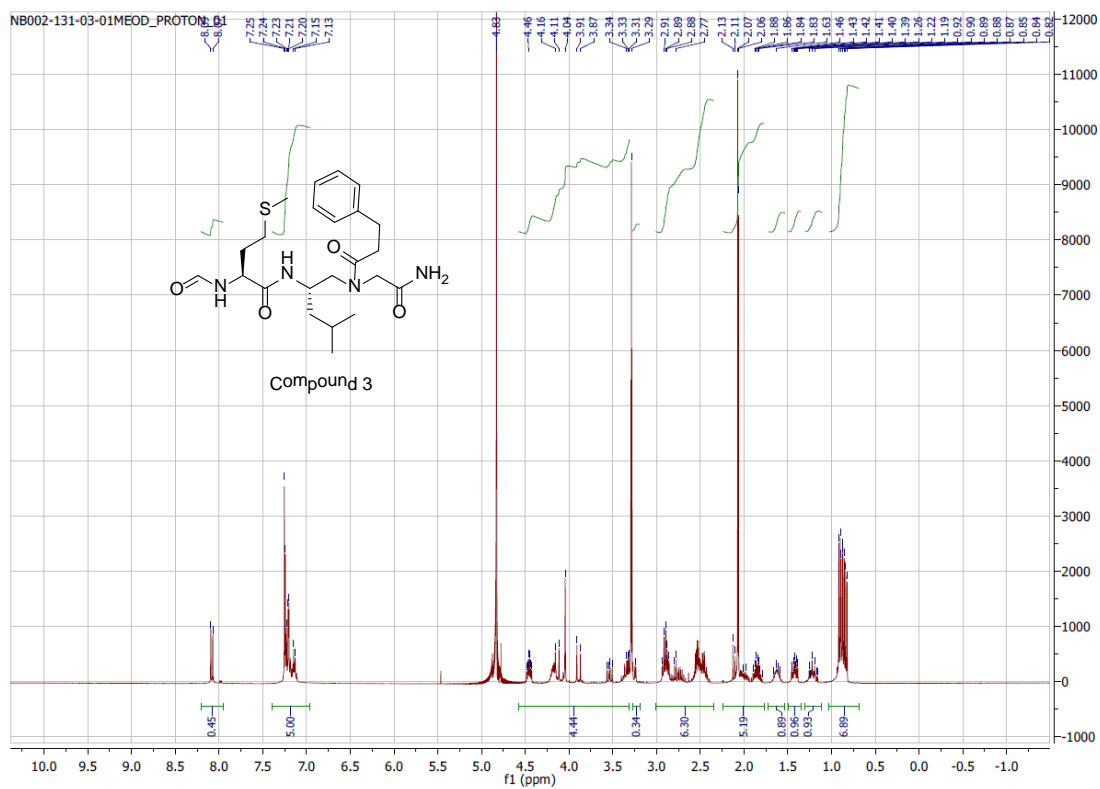

Compound 3.  $^1\text{H-NMR}$  ( $\text{CD}_3\text{OD}$ , 400 MHz)

# Supporting information

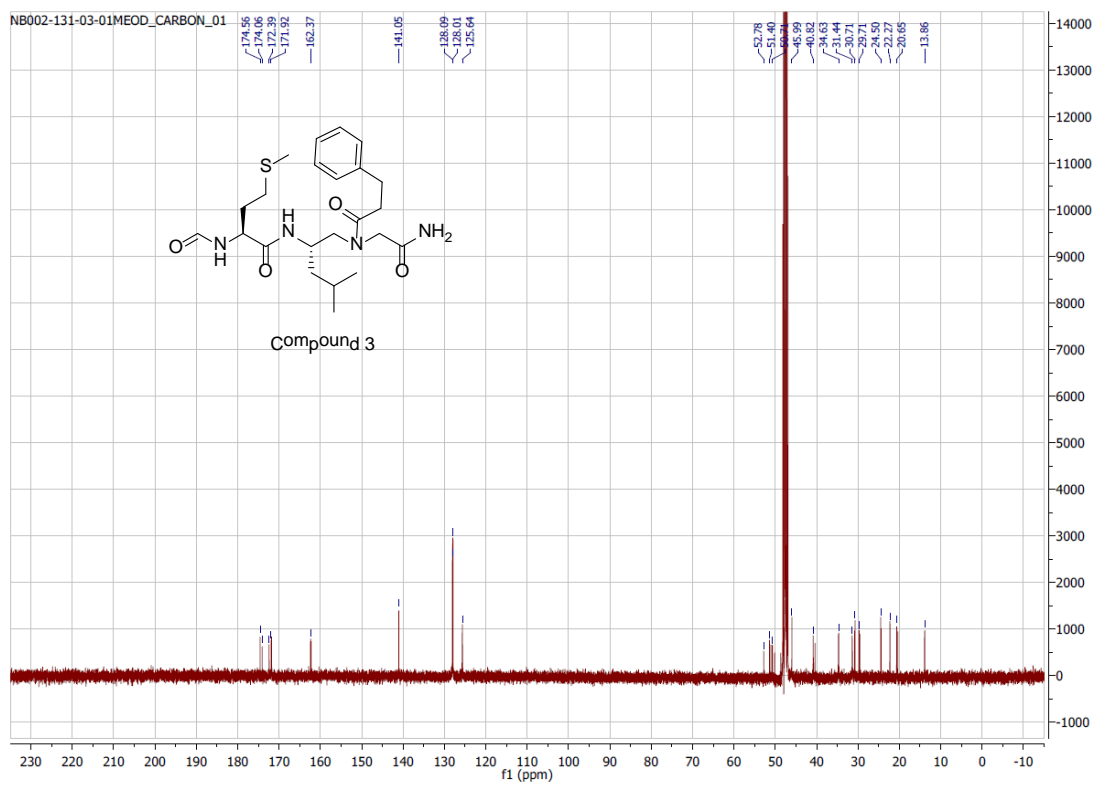

Compound 3. <sup>13</sup>C-NMR (CD<sub>3</sub>OD, 100 MHz)

# Supporting information

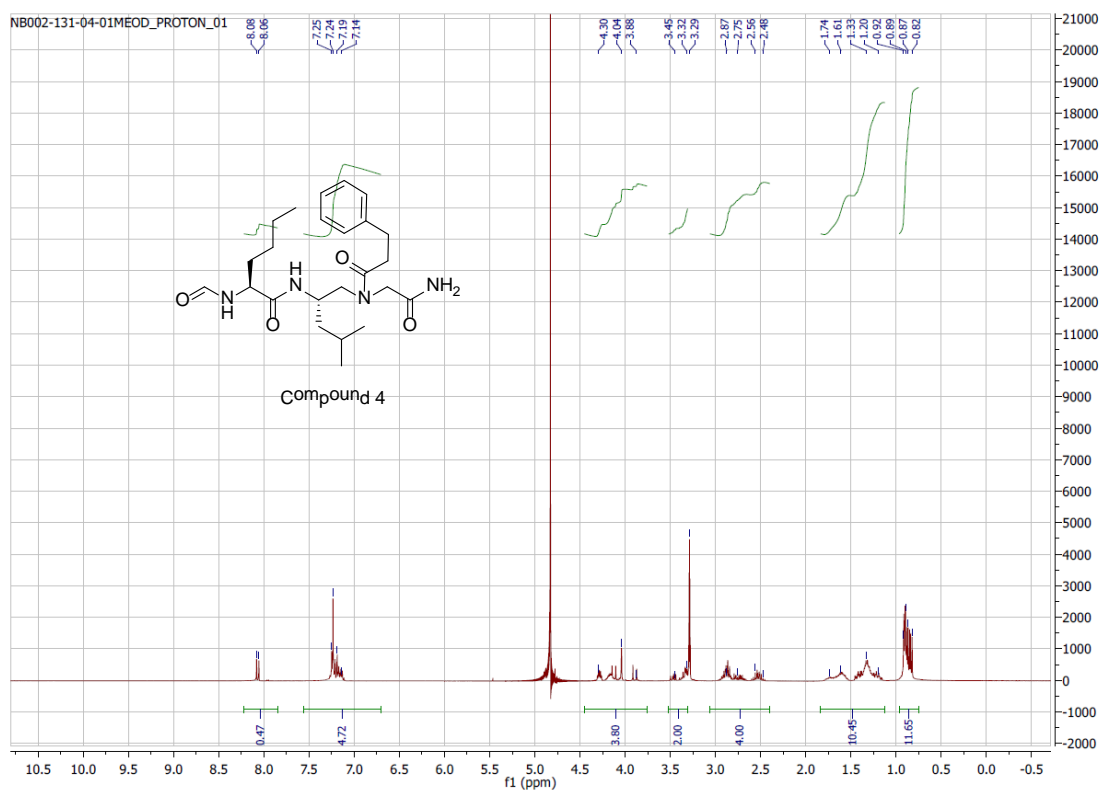

Compound 4.  $^1\text{H-NMR}$  ( $\text{CD}_3\text{OD}$ , 400 MHz)

Supporting information

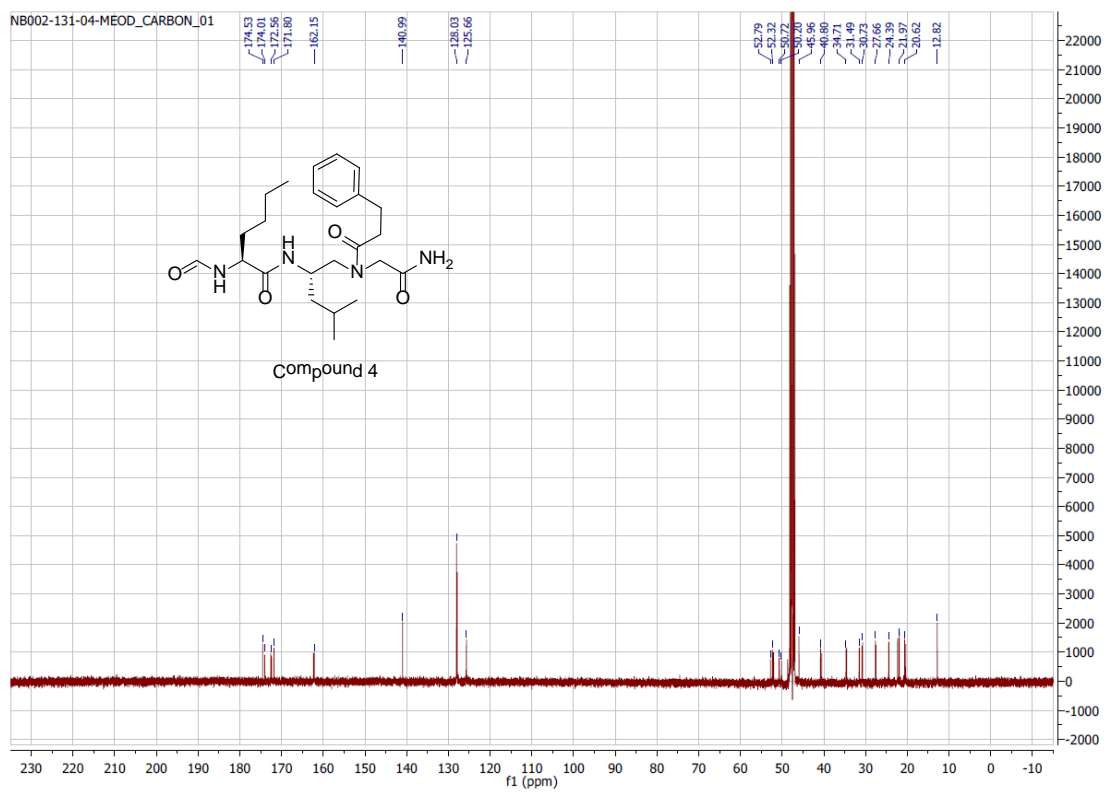

Compound 4.  $^{13}\text{C}$ -NMR ( $\text{CD}_3\text{OD}$ , 100 MHz)



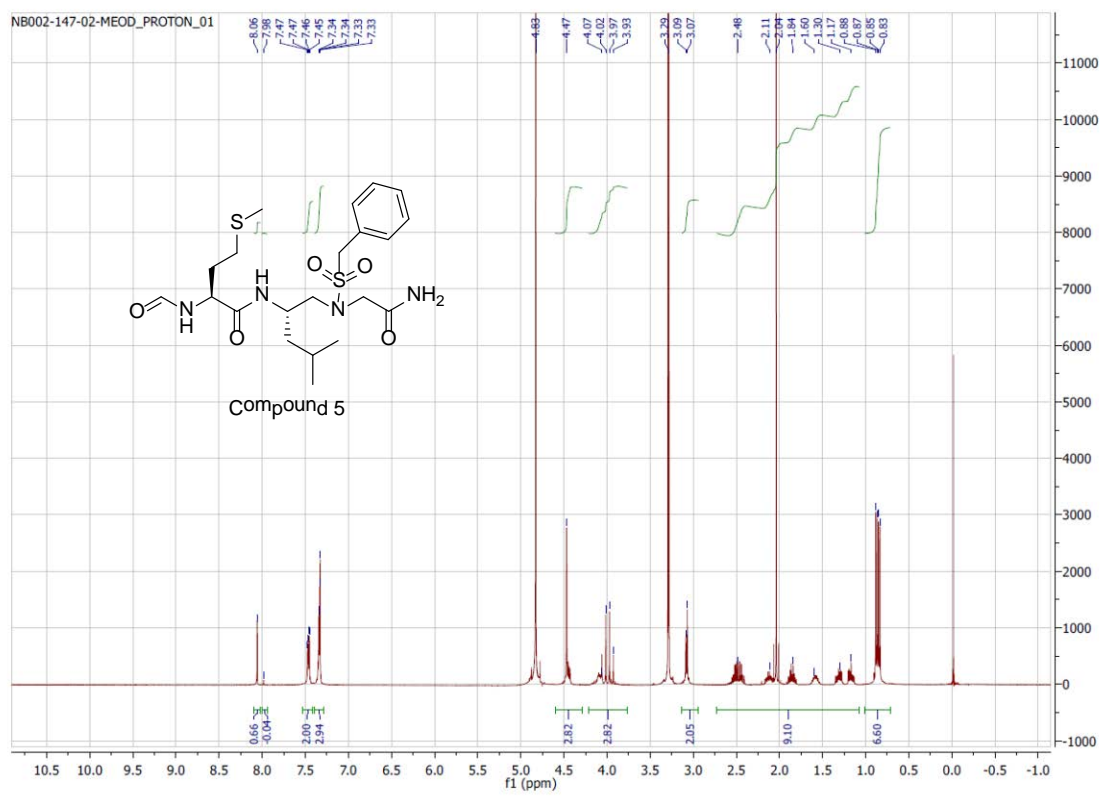Compound 5.  $^1\text{H-NMR}$  ( $\text{CD}_3\text{OD}$ , 400 MHz)

# Supporting information

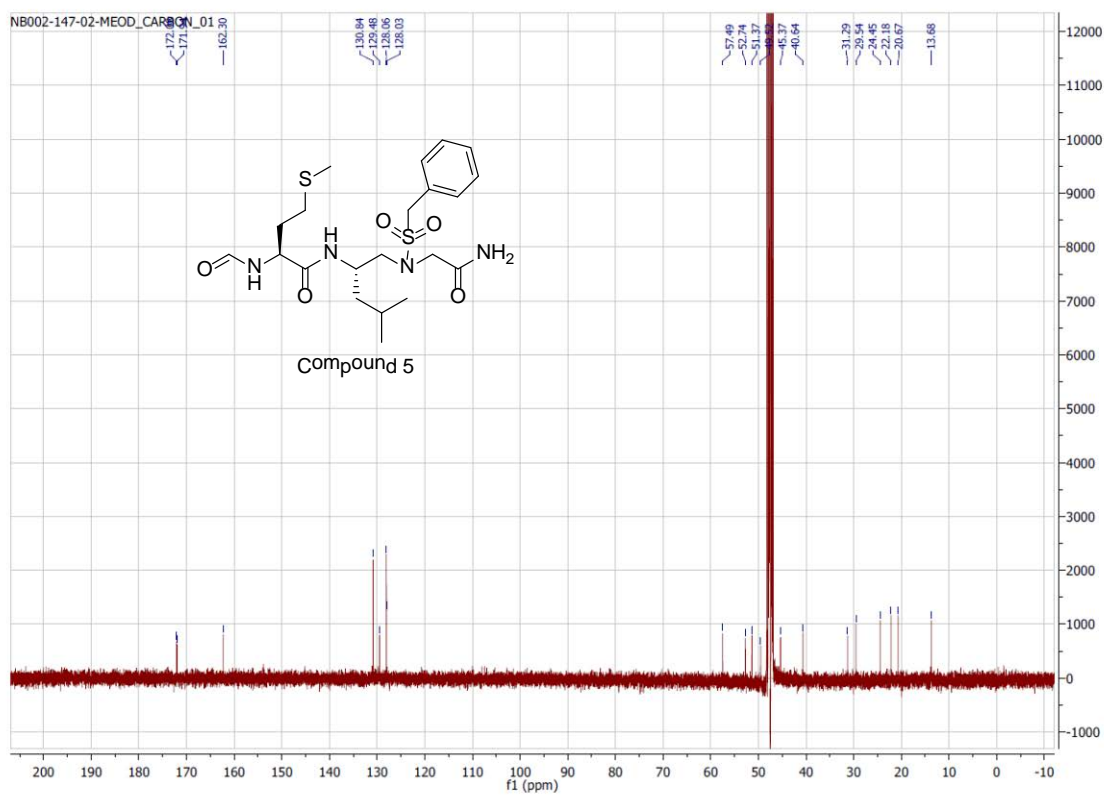

Compound 5.  $^{13}\text{C-NMR}$  (CD<sub>3</sub>OD, 100 MHz)

# Supporting information

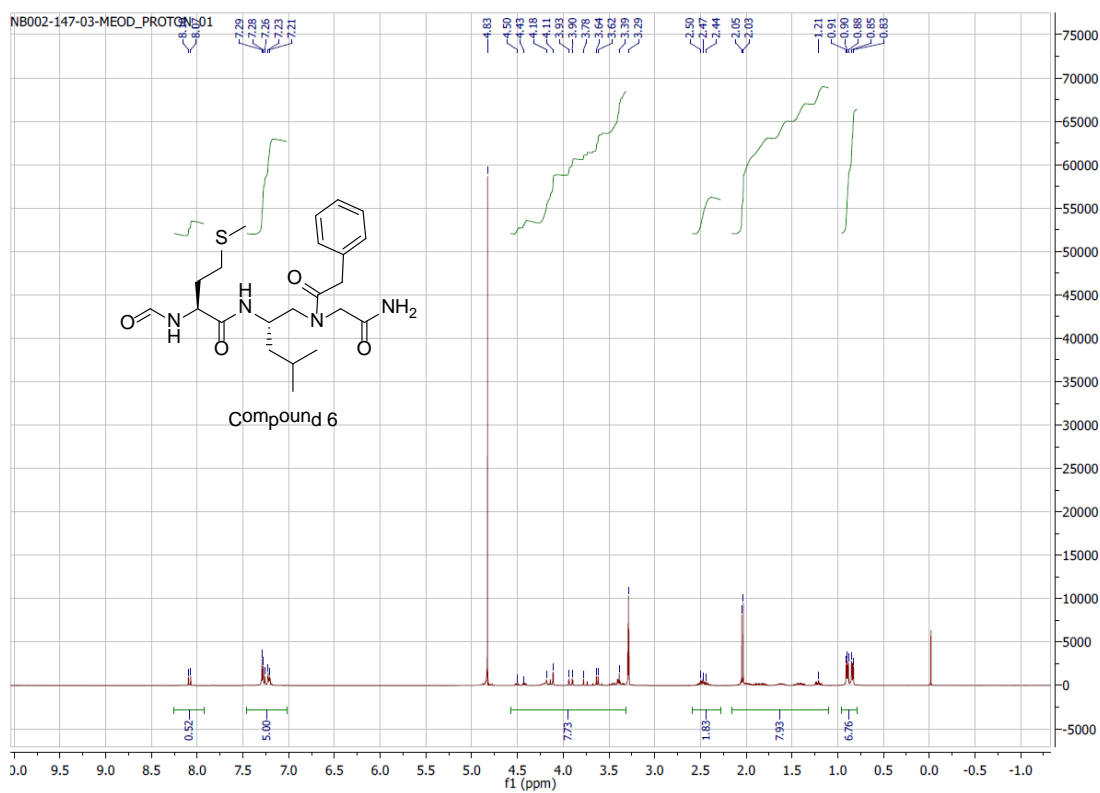

# Supporting information

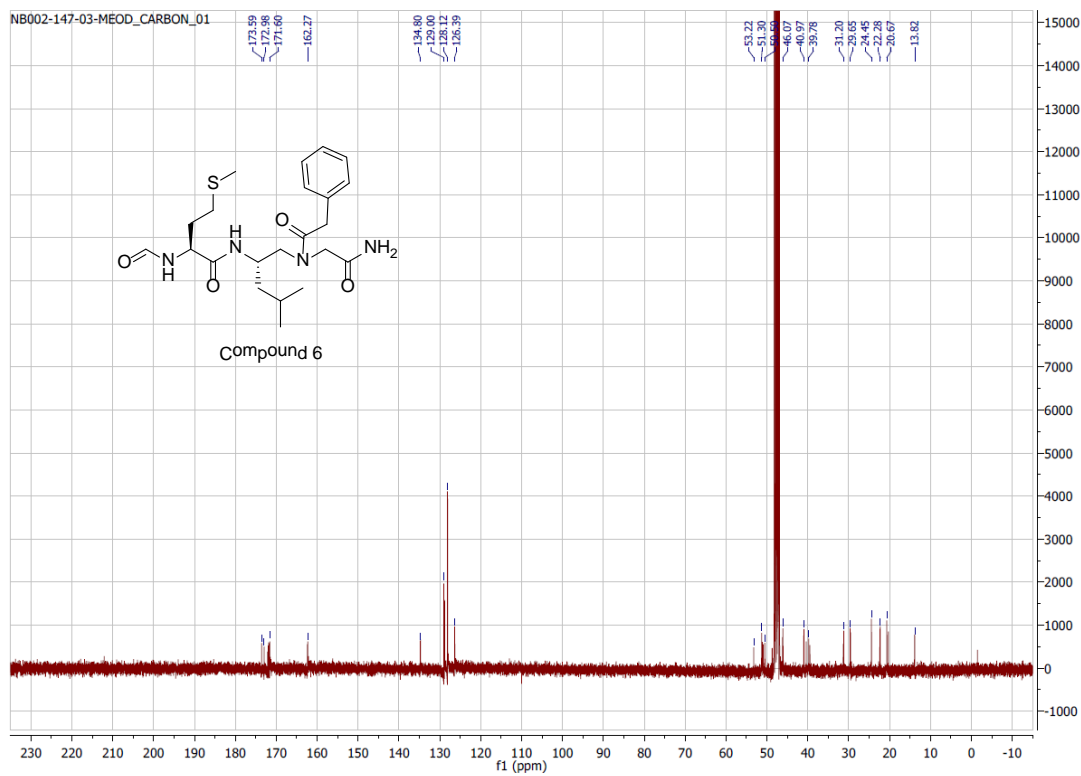

Compound 6.  $^{13}\text{C}$ -NMR ( $\text{CD}_3\text{OD}$ , 100 MHz)

# Supporting information

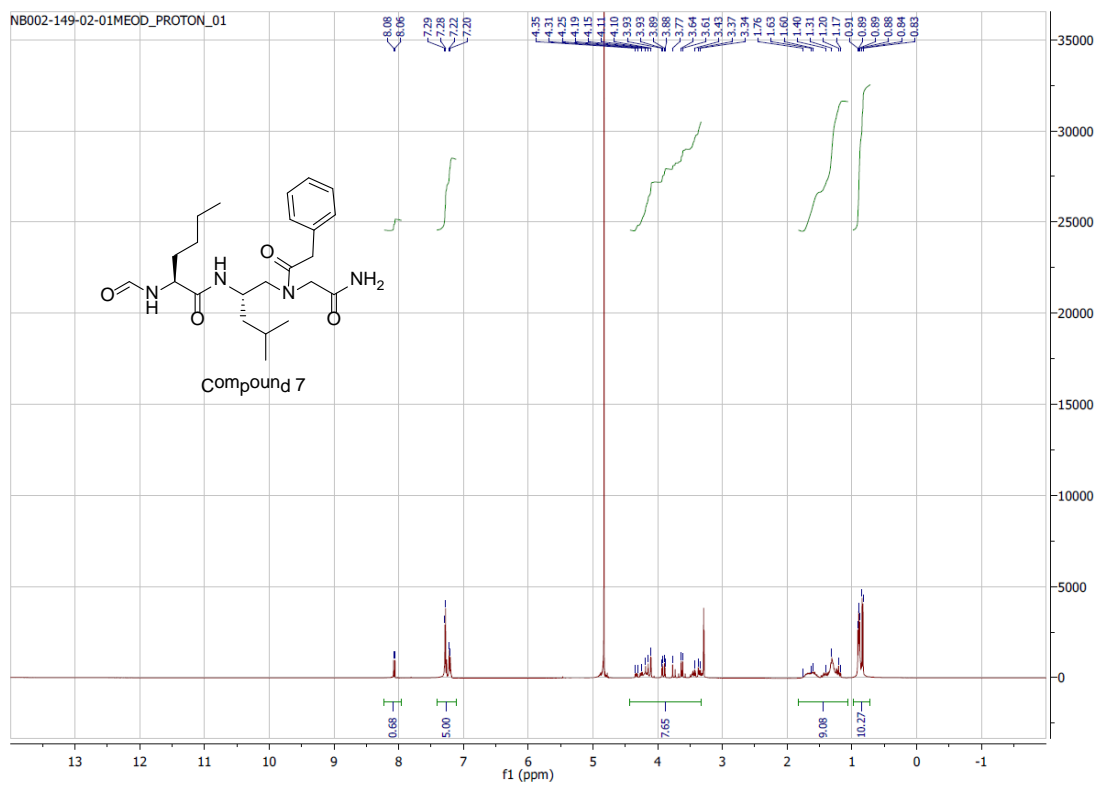

Compound 7. <sup>1</sup>H-NMR (CD<sub>3</sub>OD, 400 MHz)

# Supporting information

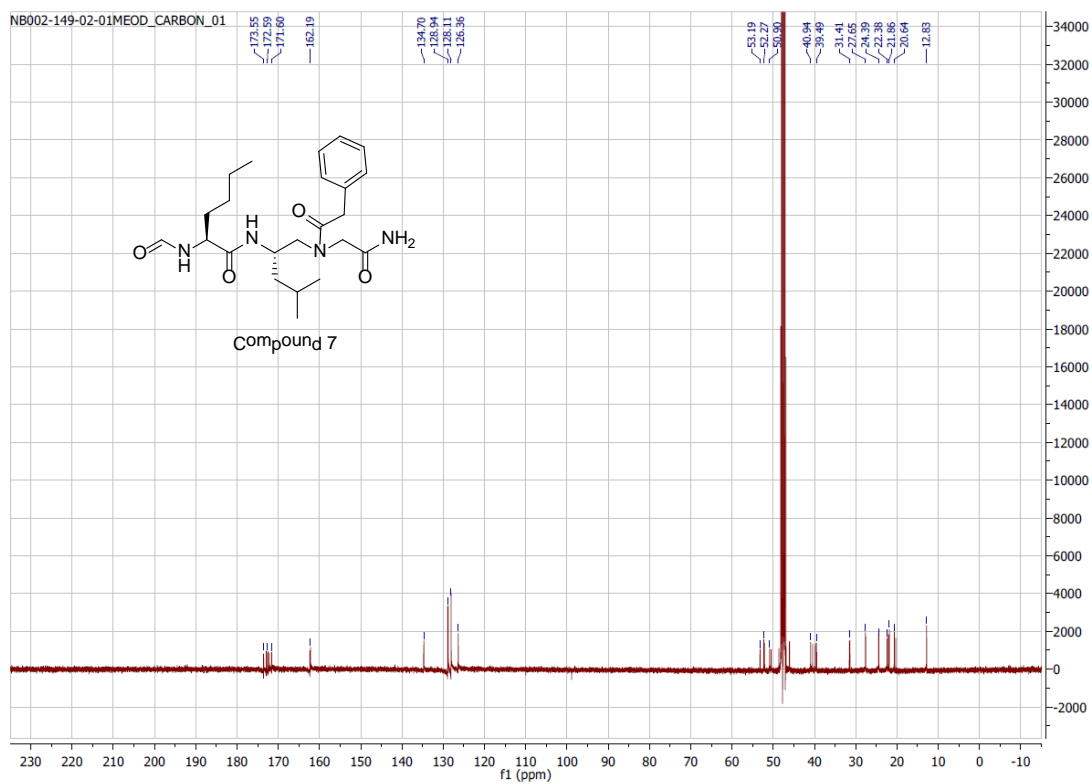

Compound 7.  $^{13}\text{C}$ -NMR ( $\text{CD}_3\text{OD}$ , 100 MHz)
